# Supplementary material
Source: PubMed Central journal article supplement (PMC6245224)
Supplement: DB180667SupplementaryData.pdf [file DB180667SupplementaryData.pdf]

SUPPLEMENTARY DATA

| Supplemental Table 1. small RNA abundance of sperm. |      |          |          |            |          |          |              |            |              | p-value        | p-value         | p-value         | p-value      |
|-----------------------------------------------------|------|----------|----------|------------|----------|----------|--------------|------------|--------------|----------------|-----------------|-----------------|--------------|
| small RNA                                           |      | Sed Mean | Chow SEM | Train Mean | Chow SEM | Sed Mean | High-Fat SEM | Train Mean | High-Fat SEM | Sed vs. T Chow | Sed Chow vs. HF | T Chow vs. T HF | Sed vs. T HF |
| Mir22_seq                                           | miR1 | 3,621.04 | 1,091.78 | 1,640.19   | 518.67   | 4,149.09 | 1,251.00     | 5,780.95   | 1,828.10     | 0.0316         | 0.6448          | 0.0349          | 0.4066       |
| Mir21a_seq                                          | miR1 | 772.12   | 232.80   | 321.85     | 101.78   | 1,512.22 | 455.95       | 1,201.21   | 379.86       | 0.0399         | 0.1341          | 0.0495          | 0.6131       |
| Mir181a-2_seq                                       | miR1 | 791.61   | 238.68   | 305.85     | 96.72    | 946.46   | 285.37       | 1,042.74   | 329.74       | 0.0163         | 0.5816          | 0.0244          | 0.7943       |
| Mir181a-1_seq                                       | miR1 | 741.45   | 223.56   | 319.95     | 101.18   | 953.64   | 287.53       | 1,026.53   | 324.62       | 0.0346         | 0.4655          | 0.0245          | 0.8427       |
| Mir30a_seq                                          | miR1 | 786.74   | 237.21   | 374.40     | 118.39   | 932.27   | 281.09       | 915.54     | 289.52       | 0.0386         | 0.6381          | 0.0209          | 0.9602       |
| Mirlet7i_seq                                        | miR1 | 540.94   | 163.10   | 230.84     | 73.00    | 607.14   | 183.06       | 810.11     | 256.18       | 0.0714         | 0.7578          | 0.0356          | 0.4885       |
| Mir5103_seq                                         | miR1 | 172.62   | 52.05    | 77.59      | 24.53    | 152.65   | 46.03        | 1,349.39   | 426.72       | 0.0399         | 0.7182          | 0.1640          | 0.1698       |
| Mir30d_seq                                          | miR1 | 393.76   | 118.72   | 190.56     | 60.26    | 570.82   | 172.11       | 489.04     | 154.65       | 0.0441         | 0.2956          | 0.0288          | 0.6689       |
| Mir146b_seq                                         | miR1 | 185.62   | 55.97    | 73.95      | 23.38    | 377.84   | 113.92       | 389.82     | 123.27       | 0.0046         | 0.1112          | 0.0899          | 0.9540       |
| Mir125a_seq                                         | miR1 | 190.41   | 57.41    | 88.27      | 27.91    | 199.31   | 60.10        | 197.50     | 62.45        | 0.0483         | 0.9051          | 0.1246          | 0.9838       |
| Mirlet7e_seq                                        | miR1 | 121.64   | 36.68    | 75.50      | 23.88    | 192.54   | 58.05        | 161.86     | 51.19        | 0.1486         | 0.4250          | 0.0458          | 0.7480       |
| Mir205_seq                                          | miR1 | 121.21   | 36.55    | 48.25      | 15.26    | 156.94   | 47.32        | 99.07      | 31.33        | 0.0438         | 0.5057          | 0.1557          | 0.3011       |
| Mir101a_seq                                         | miR1 | 117.27   | 35.36    | 37.93      | 12.00    | 151.68   | 45.73        | 115.18     | 36.42        | 0.0297         | 0.5407          | 0.0187          | 0.5146       |
| Mir181c_seq                                         | miR1 | 107.47   | 32.40    | 48.01      | 15.18    | 138.94   | 41.89        | 94.68      | 29.94        | 0.0313         | 0.6033          | 0.0178          | 0.4651       |
| Mir133a-2_seq                                       | miR1 | 36.06    | 10.87    | 13.01      | 4.11     | 24.16    | 7.29         | 255.27     | 80.72        | 0.0388         | 0.3124          | 0.2903          | 0.2905       |
| Mir103-1_seq                                        | miR1 | 67.79    | 20.44    | 34.37      | 10.87    | 78.19    | 23.58        | 70.65      | 22.34        | 0.1394         | 0.7003          | 0.0417          | 0.7532       |
| Mir181b-2_seq                                       | miR1 | 63.01    | 19.00    | 23.73      | 7.50     | 64.54    | 19.46        | 72.43      | 22.91        | 0.0327         | 0.9500          | 0.0181          | 0.7634       |
| Mir181b-1_seq                                       | miR1 | 63.82    | 19.24    | 21.42      | 6.77     | 64.78    | 19.53        | 68.15      | 21.55        | 0.0144         | 0.9661          | 0.0211          | 0.8923       |
| Mir148b_seq                                         | miR1 | 59.03    | 17.80    | 25.29      | 8.00     | 71.10    | 21.44        | 48.31      | 15.28        | 0.0245         | 0.5565          | 0.1066          | 0.2803       |
| Mirlet7j_seq                                        | miR1 | 49.22    | 14.84    | 16.83      | 5.32     | 64.09    | 19.32        | 71.68      | 22.67        | 0.0609         | 0.5041          | 0.0238          | 0.7795       |
| Mir465c-2_seq                                       | miR1 | 34.91    | 10.53    | 58.30      | 18.44    | 53.23    | 16.05        | 48.03      | 15.19        | 0.0489         | 0.3563          | 0.4673          | 0.8117       |
| Mir126a_seq                                         | miR1 | 46.82    | 14.12    | 13.34      | 4.22     | 66.97    | 20.19        | 36.69      | 11.60        | 0.0186         | 0.5561          | 0.0328          | 0.3855       |
| Mir199a-2_seq                                       | miR1 | 46.97    | 14.16    | 16.11      | 5.09     | 56.12    | 16.92        | 45.59      | 14.42        | 0.0815         | 0.7121          | 0.0111          | 0.6329       |
| Mir199a-1_seq                                       | miR1 | 36.97    | 11.15    | 16.82      | 5.32     | 53.65    | 16.17        | 51.64      | 16.33        | 0.0551         | 0.4344          | 0.0131          | 0.9314       |
| Mir98_seq                                           | miR1 | 25.96    | 7.83     | 14.69      | 4.65     | 51.41    | 15.50        | 60.65      | 19.18        | 0.1045         | 0.0862          | 0.0367          | 0.7004       |
| Mir199b_seq                                         | miR1 | 36.90    | 11.13    | 14.24      | 4.50     | 48.10    | 14.50        | 52.00      | 16.44        | 0.0089         | 0.5348          | 0.0053          | 0.8503       |
| Mir100_seq                                          | miR1 | 31.64    | 9.54     | 16.34      | 5.17     | 33.38    | 10.06        | 45.47      | 14.38        | 0.0357         | 0.8789          | 0.0150          | 0.4062       |

SUPPLEMENTARY DATA

|               |      |       |       |       |       |       |       |       |       |        |        |        |        |
|---------------|------|-------|-------|-------|-------|-------|-------|-------|-------|--------|--------|--------|--------|
| Mir465b-1_seq | miR1 | 16.43 | 4.95  | 30.96 | 9.79  | 35.13 | 10.59 | 31.28 | 9.89  | 0.0196 | 0.0859 | 0.9734 | 0.7663 |
| Mir126b_seq   | miR1 | 29.88 | 9.01  | 11.20 | 3.54  | 48.12 | 14.51 | 21.01 | 6.64  | 0.0473 | 0.4561 | 0.1346 | 0.2772 |
| Mir541_seq    | miR1 | 20.85 | 6.29  | 8.93  | 2.82  | 30.86 | 9.31  | 45.85 | 14.50 | 0.0319 | 0.2152 | 0.0506 | 0.4173 |
| Mir107_seq    | miR1 | 34.46 | 10.39 | 10.03 | 3.17  | 33.62 | 10.14 | 22.39 | 7.08  | 0.0476 | 0.9525 | 0.1150 | 0.3340 |
| Mir3470b_seq  | miR1 | 31.63 | 9.54  | 13.19 | 4.17  | 19.11 | 5.76  | 32.70 | 10.34 | 0.0167 | 0.0816 | 0.0527 | 0.1511 |
| Mir200c_seq   | miR1 | 20.47 | 6.17  | 10.11 | 3.20  | 29.06 | 8.76  | 34.59 | 10.94 | 0.0415 | 0.4946 | 0.2806 | 0.8219 |
| Mir210_seq    | miR1 | 15.14 | 4.56  | 5.52  | 1.75  | 36.15 | 10.90 | 22.29 | 7.05  | 0.0223 | 0.1151 | 0.0078 | 0.3309 |
| Mir1895_seq   | miR1 | 18.64 | 5.62  | 31.80 | 10.06 | 12.68 | 3.82  | 14.59 | 4.61  | 0.0492 | 0.2274 | 0.0140 | 0.6940 |
| Mir6236_seq   | miR1 | 22.57 | 6.81  | 8.99  | 2.84  | 12.68 | 3.82  | 20.31 | 6.42  | 0.0251 | 0.0934 | 0.2042 | 0.3757 |
| Mir1843b_seq  | miR1 | 17.75 | 5.35  | 5.28  | 1.67  | 20.01 | 6.03  | 18.54 | 5.86  | 0.0286 | 0.7819 | 0.0119 | 0.8565 |
| Mir465_seq    | miR1 | 9.87  | 2.98  | 24.60 | 7.78  | 12.56 | 3.79  | 12.70 | 4.01  | 0.0413 | 0.5826 | 0.1093 | 0.9795 |
| Mir455_seq    | miR1 | 21.52 | 6.49  | 4.49  | 1.42  | 17.81 | 5.37  | 13.37 | 4.23  | 0.0432 | 0.7092 | 0.0602 | 0.5746 |
| Mir532_seq    | miR1 | 14.70 | 4.43  | 7.17  | 2.27  | 16.47 | 4.97  | 19.42 | 6.14  | 0.0290 | 0.7173 | 0.0665 | 0.6853 |
| Mir31_seq     | miR1 | 16.59 | 5.00  | 3.86  | 1.22  | 20.99 | 6.33  | 6.83  | 2.16  | 0.0492 | 0.6597 | 0.0668 | 0.1085 |
| Mir29c_seq    | miR1 | 11.45 | 3.45  | 3.55  | 1.12  | 13.82 | 4.17  | 8.44  | 2.67  | 0.0271 | 0.6576 | 0.0685 | 0.2979 |
| Mir671_seq    | miR1 | 9.37  | 2.83  | 3.87  | 1.22  | 10.30 | 3.11  | 14.07 | 4.45  | 0.1940 | 0.8745 | 0.0083 | 0.5073 |
| Mir8112_seq   | miR1 | 7.10  | 2.14  | 8.67  | 2.74  | 5.48  | 1.65  | 3.20  | 1.01  | 0.5296 | 0.6017 | 0.0029 | 0.3895 |
| Mir1946a_seq  | miR1 | 9.16  | 2.76  | 2.74  | 0.86  | 2.16  | 0.65  | 9.71  | 3.07  | 0.0532 | 0.0300 | 0.1608 | 0.1149 |
| Mir322_seq    | miR1 | 5.32  | 1.60  | 1.82  | 0.57  | 8.69  | 2.62  | 7.00  | 2.21  | 0.0344 | 0.3146 | 0.0519 | 0.6685 |
| Mir3074-1_seq | miR1 | 6.23  | 1.88  | 2.08  | 0.66  | 5.20  | 1.57  | 8.83  | 2.79  | 0.0543 | 0.6071 | 0.0211 | 0.1773 |
| Mir574_seq    | miR1 | 5.34  | 1.61  | 1.48  | 0.47  | 6.12  | 1.85  | 9.21  | 2.91  | 0.0613 | 0.7907 | 0.0079 | 0.3780 |
| Mir335_seq    | miR1 | 5.65  | 1.70  | 0.87  | 0.27  | 9.58  | 2.89  | 4.67  | 1.48  | 0.0286 | 0.4412 | 0.0563 | 0.3519 |
| Mir3473e_seq  | miR1 | 5.34  | 1.61  | 1.23  | 0.39  | 7.01  | 2.11  | 4.67  | 1.48  | 0.0705 | 0.6823 | 0.0387 | 0.5555 |
| Mir497b_seq   | miR1 | 6.40  | 1.93  | 2.10  | 0.66  | 5.01  | 1.51  | 4.40  | 1.39  | 0.0413 | 0.5792 | 0.1047 | 0.7750 |
| Mir410_seq    | miR1 | 2.11  | 0.64  | 3.08  | 0.97  | 5.86  | 1.77  | 6.95  | 2.20  | 0.4432 | 0.0469 | 0.1747 | 0.7188 |
| Mir497_seq    | miR1 | 7.10  | 2.14  | 1.95  | 0.62  | 5.30  | 1.60  | 2.83  | 0.89  | 0.0080 | 0.5233 | 0.4202 | 0.3390 |
| Mir136_seq    | miR1 | 5.19  | 1.57  | 1.04  | 0.33  | 4.88  | 1.47  | 6.13  | 1.94  | 0.0057 | 0.8772 | 0.0230 | 0.6283 |
| Mir33_seq     | miR1 | 6.87  | 2.07  | 0.67  | 0.21  | 3.18  | 0.96  | 4.43  | 1.40  | 0.0082 | 0.1207 | 0.0075 | 0.4522 |
| Mir5112_seq   | miR1 | 4.85  | 1.46  | 0.59  | 0.19  | 5.30  | 1.60  | 2.96  | 0.94  | 0.0094 | 0.8561 | 0.0133 | 0.3145 |
| Mir381_seq    | miR1 | 2.85  | 0.86  | 0.56  | 0.18  | 2.72  | 0.82  | 7.14  | 2.26  | 0.0291 | 0.9294 | 0.1007 | 0.2610 |

SUPPLEMENTARY DATA

|               |      |       |       |       |      |       |       |       |       |         |        |        |        |
|---------------|------|-------|-------|-------|------|-------|-------|-------|-------|---------|--------|--------|--------|
| Mir501_seq    | miR1 | 3.05  | 0.92  | 0.52  | 0.17 | 2.75  | 0.83  | 5.94  | 1.88  | 0.0461  | 0.8228 | 0.0342 | 0.1960 |
| Mir155_seq    | miR1 | 2.43  | 0.73  | 0.56  | 0.18 | 3.48  | 1.05  | 5.74  | 1.81  | 0.1318  | 0.5537 | 0.0148 | 0.3392 |
| Mir7222_seq   | miR1 | 4.26  | 1.28  | 0.57  | 0.18 | 2.65  | 0.80  | 4.20  | 1.33  | 0.1225  | 0.5780 | 0.0220 | 0.5190 |
| Mir187_seq    | miR1 | 2.27  | 0.69  | 0.76  | 0.24 | 2.21  | 0.67  | 3.21  | 1.01  | 0.1830  | 0.9700 | 0.0412 | 0.5627 |
| Mir129-2_seq  | miR1 | 1.13  | 0.34  | 0.56  | 0.18 | 1.24  | 0.37  | 2.67  | 0.84  | 0.3258  | 0.8823 | 0.0425 | 0.1930 |
| Mir3065_seq   | miR1 | 0.19  | 0.06  | 2.39  | 0.75 | 1.76  | 0.53  | 0.61  | 0.19  | 0.2921  | 0.0426 | 0.4175 | 0.1674 |
| Mir1947_seq   | miR1 | 0.69  | 0.21  | 0.11  | 0.04 | 1.10  | 0.33  | 2.07  | 0.66  | 0.2046  | 0.5226 | 0.0301 | 0.3075 |
| Mir466i_seq   | miR1 | 0.00  | 0.00  | 0.25  | 0.08 | 1.73  | 0.52  | 1.24  | 0.39  | 0.0295  | 0.0122 | 0.0987 | 0.5783 |
| Mir202_seq    | miR1 | 0.00  | 0.00  | 0.51  | 0.16 | 0.74  | 0.22  | 1.88  | 0.59  | 0.1590  | 0.0273 | 0.4143 | 0.4731 |
| Mir344f_seq   | miR1 | 1.48  | 0.45  | 0.08  | 0.03 | 1.19  | 0.36  | 0.00  | 0.00  | 0.2105  | 0.8042 | 0.3293 | 0.0490 |
| Mir5131_seq   | miR1 | 0.07  | 0.02  | 0.43  | 0.14 | 1.96  | 0.59  | 0.29  | 0.09  | 0.1889  | 0.0148 | 0.6608 | 0.0404 |
| Mir219a-1_seq | miR1 | 0.00  | 0.00  | 0.25  | 0.08 | 0.87  | 0.26  | 1.50  | 0.48  | 0.1499  | 0.0131 | 0.0926 | 0.4012 |
| Mirlet7k_seq  | miR1 | 1.10  | 0.33  | 0.04  | 0.01 | 1.33  | 0.40  | 0.00  | 0.00  | 0.2341  | 0.8199 | 0.3293 | 0.0323 |
| Mir1306_seq   | miR1 | 1.01  | 0.30  | 0.06  | 0.02 | 0.42  | 0.13  | 0.88  | 0.28  | 0.0290  | 0.1977 | 0.1442 | 0.4231 |
| Mir5122_seq   | miR1 | 1.15  | 0.35  | 0.00  | 0.00 | 0.19  | 0.06  | 0.71  | 0.23  | 0.1858  | 0.2495 | 0.0248 | 0.1095 |
| Mir500_seq    | miR1 | 0.00  | 0.00  | 0.00  | 0.00 | 1.38  | 0.42  | 0.56  | 0.18  | #DIV/0! | 0.0240 | 0.2138 | 0.2743 |
| Mir5620_seq   | miR1 | 0.00  | 0.00  | 0.81  | 0.26 | 0.38  | 0.11  | 0.45  | 0.14  | 0.0448  | 0.3282 | 0.4669 | 0.8833 |
| Mir8093_seq   | miR1 | 0.15  | 0.05  | 0.00  | 0.00 | 1.15  | 0.35  | 0.12  | 0.04  | 0.3502  | 0.0246 | 0.3293 | 0.0223 |
| Mir370_seq    | miR1 | 0.00  | 0.00  | 0.16  | 0.05 | 0.53  | 0.16  | 0.00  | 0.00  | 0.3071  | 0.0453 | 0.3293 | 0.0554 |
| pi-Ccrn4l.2   | piRs | 63.42 | 19.12 | 26.88 | 8.50 | 33.88 | 10.21 | 70.51 | 22.30 | 0.0376  | 0.0903 | 0.1499 | 0.2116 |
| pi-Fth1.1     | piRs | 40.15 | 12.10 | 19.91 | 6.30 | 46.90 | 14.14 | 69.36 | 21.93 | 0.0235  | 0.6120 | 0.2132 | 0.5642 |
| pi-Hjurp.2    | piRs | 60.60 | 18.27 | 20.16 | 6.37 | 37.47 | 11.30 | 48.26 | 15.26 | 0.0521  | 0.2698 | 0.0427 | 0.4804 |
| pi-Cbx5.4     | piRs | 44.18 | 13.32 | 18.44 | 5.83 | 27.34 | 8.24  | 31.36 | 9.92  | 0.0438  | 0.1939 | 0.2025 | 0.7135 |
| pi-Tacc1.5    | piRs | 42.75 | 12.89 | 15.34 | 4.85 | 21.39 | 6.45  | 29.01 | 9.17  | 0.0455  | 0.1052 | 0.1828 | 0.4509 |
| pi-Mrs2.3     | piRs | 21.02 | 6.34  | 8.40  | 2.66 | 14.54 | 4.38  | 59.21 | 18.73 | 0.0111  | 0.2431 | 0.1549 | 0.1904 |
| pi-Mrs2.4     | piRs | 21.59 | 6.51  | 9.20  | 2.91 | 17.22 | 5.19  | 44.63 | 14.11 | 0.0447  | 0.5047 | 0.1544 | 0.2491 |
| pi-Fbxl18.3   | piRs | 26.35 | 7.94  | 11.32 | 3.58 | 17.48 | 5.27  | 23.62 | 7.47  | 0.0489  | 0.2816 | 0.0813 | 0.4369 |
| pi-Ing5.1     | piRs | 28.05 | 8.46  | 10.22 | 3.23 | 11.71 | 3.53  | 14.82 | 4.69  | 0.0421  | 0.0359 | 0.4202 | 0.4854 |
| pi-Fbxo41.1   | piRs | 21.93 | 6.61  | 6.42  | 2.03 | 15.37 | 4.63  | 17.21 | 5.44  | 0.0190  | 0.3708 | 0.0690 | 0.7937 |
| pi-Tef.3      | piRs | 15.32 | 4.62  | 5.99  | 1.89 | 10.55 | 3.18  | 9.71  | 3.07  | 0.0415  | 0.3741 | 0.2764 | 0.8598 |

SUPPLEMENTARY DATA

|                      |      |          |        |          |        |          |          |          |        |        |        |        |        |
|----------------------|------|----------|--------|----------|--------|----------|----------|----------|--------|--------|--------|--------|--------|
| pi-D10Wsu102e.1      | piRs | 13.24    | 3.99   | 3.31     | 1.05   | 5.89     | 1.77     | 8.38     | 2.65   | 0.0295 | 0.1044 | 0.2029 | 0.5415 |
| 13-qA5-208.3         | piRs | 6.28     | 1.89   | 2.07     | 0.66   | 10.52    | 3.17     | 7.98     | 2.52   | 0.0091 | 0.3890 | 0.0475 | 0.6513 |
| pi-Smcr8.2           | piRs | 1.32     | 0.40   | 2.80     | 0.89   | 1.91     | 0.57     | 0.25     | 0.08   | 0.2005 | 0.4658 | 0.0195 | 0.0102 |
| pi-Hist1h1a.2        | piRs | 1.41     | 0.43   | 0.23     | 0.07   | 0.74     | 0.22     | 1.42     | 0.45   | 0.0751 | 0.3583 | 0.0370 | 0.3093 |
| pi-Ip6k1.12          | piRs | 0.50     | 0.15   | 0.36     | 0.11   | 0.23     | 0.07     | 0.00     | 0.00   | 0.7076 | 0.4726 | 0.0479 | 0.2353 |
| RLTR4I_MM:ERV1       | rmsk | 641.28   | 193.35 | 368.53   | 116.54 | 726.74   | 219.12   | 1,490.47 | 471.33 | 0.0136 | 0.6342 | 0.1236 | 0.2772 |
| RLTR4_MM:ERV1        | rmsk | 55.93    | 16.86  | 31.06    | 9.82   | 72.74    | 21.93    | 71.53    | 22.62  | 0.0487 | 0.3574 | 0.0554 | 0.9601 |
| IAPEY5_I:ERV2        | rmsk | 6.90     | 2.08   | 1.80     | 0.57   | 3.56     | 1.07     | 4.36     | 1.38   | 0.0462 | 0.1928 | 0.2344 | 0.7225 |
| RMER17B2:ERV2        | rmsk | 4.24     | 1.28   | 1.85     | 0.59   | 0.92     | 0.28     | 1.88     | 0.59   | 0.1324 | 0.0112 | 0.9831 | 0.2332 |
| IAPEY5_LTR:ERV2      | rmsk | 1.88     | 0.57   | 0.22     | 0.07   | 1.82     | 0.55     | 4.88     | 1.54   | 0.0346 | 0.9595 | 0.2110 | 0.4049 |
| RMER6C:ERV2          | rmsk | 3.03     | 0.91   | 0.61     | 0.19   | 1.82     | 0.55     | 2.53     | 0.80   | 0.0475 | 0.3554 | 0.1279 | 0.6058 |
| LX5c:L1              | rmsk | 3.25     | 0.98   | 0.63     | 0.20   | 1.45     | 0.44     | 2.01     | 0.63   | 0.0212 | 0.1037 | 0.1445 | 0.5586 |
| LX9:L1               | rmsk | 1.48     | 0.45   | 1.15     | 0.37   | 1.27     | 0.38     | 3.25     | 1.03   | 0.6980 | 0.7946 | 0.0421 | 0.0493 |
| L1MdA_V:L1           | rmsk | 2.87     | 0.86   | 0.32     | 0.10   | 0.48     | 0.14     | 1.25     | 0.39   | 0.0134 | 0.0180 | 0.2089 | 0.3029 |
| LTRIS_Mus:ERV1       | rmsk | 0.25     | 0.08   | 0.56     | 0.18   | 1.21     | 0.36     | 2.05     | 0.65   | 0.4262 | 0.0433 | 0.3402 | 0.5742 |
| LX5:L1               | rmsk | 0.15     | 0.05   | 0.95     | 0.30   | 1.36     | 0.41     | 1.58     | 0.50   | 0.0503 | 0.0459 | 0.4135 | 0.7998 |
| LX6:L1               | rmsk | 1.49     | 0.45   | 0.04     | 0.01   | 0.94     | 0.28     | 1.00     | 0.32   | 0.1006 | 0.5438 | 0.0422 | 0.9112 |
| RLTR48A:ERV1         | rmsk | 0.00     | 0.00   | 0.76     | 0.24   | 1.19     | 0.36     | 1.44     | 0.46   | 0.0694 | 0.0149 | 0.5268 | 0.8073 |
| B1F:SINE1/7SL        | rmsk | 1.73     | 0.52   | 0.00     | 0.00   | 0.35     | 0.11     | 0.80     | 0.25   | 0.0202 | 0.0606 | 0.1400 | 0.4233 |
| RLTR11C_MM:ERV2      | rmsk | 1.70     | 0.51   | 0.15     | 0.05   | 0.76     | 0.23     | 0.21     | 0.07   | 0.1676 | 0.4093 | 0.7585 | 0.2423 |
| LTRIS6:ERV1          | rmsk | 0.89     | 0.27   | 0.23     | 0.07   | 0.17     | 0.05     | 1.32     | 0.42   | 0.2741 | 0.2241 | 0.0623 | 0.0468 |
| LTRIS4A:ERV1         | rmsk | 1.64     | 0.49   | 0.38     | 0.12   | 0.17     | 0.05     | 0.24     | 0.08   | 0.0853 | 0.0383 | 0.5262 | 0.7687 |
| RLTR33_MM:ERV3       | rmsk | 1.37     | 0.41   | 0.00     | 0.00   | 0.18     | 0.05     | 0.88     | 0.28   | 0.0485 | 0.0801 | 0.1065 | 0.2014 |
| RLTR1A2_MM:ERV1      | rmsk | 0.25     | 0.08   | 0.16     | 0.05   | 1.57     | 0.47     | 0.06     | 0.02   | 0.6707 | 0.0726 | 0.4537 | 0.0452 |
| RLTR16:ERV2          | rmsk | 0.34     | 0.10   | 0.32     | 0.10   | 0.31     | 0.09     | 0.00     | 0.00   | 0.9553 | 0.9473 | 0.0489 | 0.3502 |
| chr3.trna747-HisGTG  | tRFs | 2,742.16 | 826.79 | 3,053.16 | 965.49 | 3,188.14 | 961.26   | 2,405.25 | 760.61 | 0.4619 | 0.2378 | 0.1424 | 0.0488 |
| chr2.trna1431-HisGTG | tRFs | 2,773.48 | 836.24 | 3,042.35 | 962.08 | 3,176.01 | 957.60   | 2,387.36 | 754.95 | 0.5202 | 0.2885 | 0.1272 | 0.0442 |
| chr1.trna702-GlyGCC  | tRFs | 1,671.69 | 504.03 | 1,392.07 | 440.21 | 3,526.48 | 1,063.27 | 3,134.03 | 991.07 | 0.0288 | 0.0055 | 0.1610 | 0.7658 |
| chr1.trna704-GlyGCC  | tRFs | 1,678.64 | 506.13 | 1,381.10 | 436.74 | 3,518.06 | 1,060.74 | 3,120.33 | 986.74 | 0.0241 | 0.0050 | 0.1586 | 0.7601 |
| chr1.trna706-GlyGCC  | tRFs | 1,682.68 | 507.35 | 1,375.77 | 435.06 | 3,523.75 | 1,062.45 | 3,082.89 | 974.90 | 0.0224 | 0.0061 | 0.1684 | 0.7379 |

SUPPLEMENTARY DATA

|                       |      |          |        |          |        |          |          |          |        |        |        |        |        |
|-----------------------|------|----------|--------|----------|--------|----------|----------|----------|--------|--------|--------|--------|--------|
| chr3.trna287-GlyCCC   | tRFs | 961.03   | 289.76 | 527.76   | 166.89 | 4,288.63 | 1,293.07 | 1,417.73 | 448.33 | 0.0396 | 0.0011 | 0.0550 | 0.0091 |
| chr3.trna755-GlyCCC   | tRFs | 942.18   | 284.08 | 497.22   | 157.24 | 4,258.58 | 1,284.01 | 1,349.59 | 426.78 | 0.0312 | 0.0008 | 0.0631 | 0.0069 |
| chr17.trna81-LysCTT   | tRFs | 1,283.00 | 386.84 | 1,458.59 | 461.25 | 1,836.97 | 553.87   | 1,136.63 | 359.43 | 0.4245 | 0.0438 | 0.2784 | 0.0408 |
| chr17.trna83-LysCTT   | tRFs | 1,289.28 | 388.73 | 1,427.85 | 451.53 | 1,821.34 | 549.15   | 1,151.73 | 364.21 | 0.5192 | 0.0488 | 0.3408 | 0.0460 |
| chr11.trna2023-LysCTT | tRFs | 1,276.17 | 384.78 | 1,450.12 | 458.57 | 1,821.61 | 549.24   | 1,123.23 | 355.20 | 0.4148 | 0.0452 | 0.2712 | 0.0427 |
| chr9.trna961-GluTTC   | tRFs | 1,468.10 | 442.65 | 1,785.18 | 564.52 | 1,022.82 | 308.39   | 1,131.71 | 357.88 | 0.3448 | 0.0765 | 0.0496 | 0.6108 |
| chr14.trna352-GluTTC  | tRFs | 1,444.24 | 435.45 | 1,772.71 | 560.58 | 1,070.35 | 322.72   | 1,107.31 | 350.16 | 0.3483 | 0.1551 | 0.0460 | 0.8597 |
| chr7.trna339-GluTTC   | tRFs | 1,454.97 | 438.69 | 1,763.51 | 557.67 | 1,059.37 | 319.41   | 1,099.15 | 347.58 | 0.3608 | 0.1195 | 0.0440 | 0.8505 |
| chr13.trna97-ValCAC   | tRFs | 795.93   | 239.98 | 405.88   | 128.35 | 1,273.83 | 384.08   | 521.38   | 164.88 | 0.0027 | 0.0222 | 0.1894 | 0.0006 |
| chr13.trna98-ValCAC   | tRFs | 680.13   | 205.07 | 357.06   | 112.91 | 1,172.52 | 353.53   | 564.67   | 178.56 | 0.0021 | 0.0349 | 0.0296 | 0.0139 |
| chr13.trna974-ValAAC  | tRFs | 715.21   | 215.64 | 349.54   | 110.54 | 1,059.35 | 319.41   | 455.28   | 143.97 | 0.0016 | 0.0725 | 0.1870 | 0.0028 |
| chr13.trna93-ValAAC   | tRFs | 704.13   | 212.30 | 345.58   | 109.28 | 1,062.50 | 320.36   | 452.47   | 143.08 | 0.0011 | 0.0574 | 0.1523 | 0.0023 |
| chr13.trna977-ValAAC  | tRFs | 699.78   | 210.99 | 341.35   | 107.94 | 1,039.59 | 313.45   | 453.70   | 143.47 | 0.0028 | 0.0732 | 0.1096 | 0.0023 |
| chr4.trna67-GlyCCC    | tRFs | 353.08   | 106.46 | 212.89   | 67.32  | 961.39   | 289.87   | 326.11   | 103.12 | 0.0065 | 0.0069 | 0.0230 | 0.0071 |
| chr3.trna752-GlyCCC   | tRFs | 365.18   | 110.11 | 213.53   | 67.52  | 963.50   | 290.51   | 305.77   | 96.69  | 0.0032 | 0.0090 | 0.0402 | 0.0064 |
| chr13.trna95-ValAAC   | tRFs | 333.31   | 100.50 | 185.36   | 58.62  | 620.57   | 187.11   | 286.75   | 90.68  |        | 0.0705 | 0.1624 | 0.0508 |
| chr13.trna78-MetCAT   | tRFs | 296.04   | 89.26  | 317.46   | 100.39 | 366.90   | 110.63   | 246.85   | 78.06  | 0.7145 | 0.1777 | 0.2029 | 0.0165 |
| chr13.trna959-MetCAT  | tRFs | 303.38   | 91.47  | 302.85   | 95.77  | 372.98   | 112.46   | 243.76   | 77.08  | 0.9918 | 0.1234 | 0.2362 | 0.0043 |
| chr13.trna995-MetCAT  | tRFs | 306.15   | 92.31  | 313.26   | 99.06  | 376.94   | 113.65   | 225.48   | 71.30  | 0.8918 | 0.1243 | 0.0958 | 0.0017 |
| chr10.trna867-TrpCCA  | tRFs | 292.06   | 88.06  | 440.59   | 139.33 | 267.04   | 80.52    | 226.53   | 71.64  | 0.2297 | 0.7940 | 0.0449 | 0.5539 |
| chr13.trna111-MetCAT  | tRFs | 296.44   | 89.38  | 297.03   | 93.93  | 356.33   | 107.44   | 254.97   | 80.63  | 0.9907 | 0.1917 | 0.4329 | 0.0422 |
| chr13.trna108-MetCAT  | tRFs | 297.33   | 89.65  | 294.55   | 93.14  | 361.66   | 109.05   | 242.58   | 76.71  | 0.9578 | 0.1671 | 0.3122 | 0.0107 |
| chr3.trna792-MetCAT   | tRFs | 294.84   | 88.90  | 304.27   | 96.22  | 356.72   | 107.56   | 239.60   | 75.77  | 0.8636 | 0.1908 | 0.2508 | 0.0183 |
| chr13.trna90-MetCAT   | tRFs | 289.10   | 87.17  | 301.16   | 95.23  | 361.97   | 109.14   | 240.78   | 76.14  | 0.8248 | 0.1251 | 0.2628 | 0.0112 |
| chr13.trna82-MetCAT   | tRFs | 297.33   | 89.65  | 285.18   | 90.18  | 347.97   | 104.92   | 221.89   | 70.17  | 0.8057 | 0.2937 | 0.2092 | 0.0141 |
| chr3.trna754-GluTTC   | tRFs | 121.55   | 36.65  | 100.18   | 31.68  | 233.30   | 70.34    | 158.80   | 50.22  | 0.2132 | 0.0078 | 0.1665 | 0.1768 |
| chr3.trna286-GluTTC   | tRFs | 120.59   | 36.36  | 108.25   | 34.23  | 222.59   | 67.11    | 156.84   | 49.60  | 0.4641 | 0.0028 | 0.2675 | 0.1928 |
| chr1.trna1002-AspGTC  | tRFs | 85.30    | 25.72  | 101.44   | 32.08  | 139.05   | 41.92    | 112.00   | 35.42  | 0.4880 | 0.0293 | 0.6852 | 0.3046 |
| chr1.trna1008-AspGTC  | tRFs | 86.03    | 25.94  | 99.99    | 31.62  | 140.17   | 42.26    | 111.30   | 35.20  | 0.5401 | 0.0316 | 0.6282 | 0.2476 |
| chr13.trna993-AspGTC  | tRFs | 80.14    | 24.16  | 105.30   | 33.30  | 139.65   | 42.11    | 111.76   | 35.34  | 0.2948 | 0.0146 | 0.8111 | 0.2876 |

SUPPLEMENTARY DATA

|                       |      |       |       |        |       |        |       |        |       |        |        |        |        |
|-----------------------|------|-------|-------|--------|-------|--------|-------|--------|-------|--------|--------|--------|--------|
| chr5.trna1317-AspGTC  | tRFs | 76.29 | 23.00 | 98.46  | 31.13 | 143.64 | 43.31 | 118.34 | 37.42 | 0.3232 | 0.0081 | 0.4287 | 0.3357 |
| chr11.trna69-AspGTC   | tRFs | 83.38 | 25.14 | 91.13  | 28.82 | 144.66 | 43.62 | 116.23 | 36.76 | 0.7429 | 0.0207 | 0.3037 | 0.2718 |
| chr13.trna991-AspGTC  | tRFs | 79.84 | 24.07 | 100.54 | 31.79 | 141.92 | 42.79 | 113.37 | 35.85 | 0.3601 | 0.0162 | 0.6256 | 0.3075 |
| chr1.trna1005-AspGTC  | tRFs | 78.32 | 23.61 | 99.03  | 31.32 | 132.75 | 40.02 | 122.06 | 38.60 | 0.4086 | 0.0443 | 0.4052 | 0.7057 |
| chr1.trna707-AspGTC   | tRFs | 84.41 | 25.45 | 99.57  | 31.49 | 134.00 | 40.40 | 110.56 | 34.96 | 0.4668 | 0.0500 | 0.6048 | 0.3522 |
| chr10.trna861-AspGTC  | tRFs | 89.98 | 27.13 | 95.22  | 30.11 | 139.18 | 41.96 | 99.12  | 31.34 | 0.8267 | 0.0446 | 0.8844 | 0.1349 |
| chr3.trna293-HisGTG   | tRFs | 43.82 | 13.21 | 18.11  | 5.73  | 229.61 | 69.23 | 57.55  | 18.20 | 0.0070 | 0.0027 | 0.0502 | 0.0088 |
| chr5.trna1610-AspGTC  | tRFs | 60.53 | 18.25 | 70.94  | 22.43 | 111.75 | 33.70 | 86.47  | 27.34 | 0.6380 | 0.0347 | 0.4766 | 0.2754 |
| chr6.trna157-CysGCA   | tRFs | 81.22 | 24.49 | 77.29  | 24.44 | 85.73  | 25.85 | 54.82  | 17.33 | 0.7884 | 0.7482 | 0.1125 | 0.0268 |
| chr11.trna1433-CysGCA | tRFs | 84.41 | 25.45 | 69.11  | 21.85 | 86.69  | 26.14 | 54.83  | 17.34 | 0.4063 | 0.8957 | 0.3470 | 0.0344 |
| chr11.trna791-CysGCA  | tRFs | 76.95 | 23.20 | 77.45  | 24.49 | 86.14  | 25.97 | 53.43  | 16.89 | 0.9755 | 0.5550 | 0.0864 | 0.0174 |
| chr3.trna749-HisGTG   | tRFs | 33.07 | 9.97  | 32.45  | 10.26 | 114.22 | 34.44 | 50.84  | 16.08 | 0.9369 | 0.0009 | 0.1306 | 0.0135 |
| chr19.trna713-SerGCT  | tRFs | 21.51 | 6.48  | 27.46  | 8.68  | 23.62  | 7.12  | 16.22  | 5.13  | 0.2573 | 0.6832 | 0.0136 | 0.0979 |
| chr2.trna1509-SerGCT  | tRFs | 16.91 | 5.10  | 28.29  | 8.94  | 17.59  | 5.30  | 15.08  | 4.77  | 0.0126 | 0.8424 | 0.0206 | 0.5817 |
| chr13.trna982-SerGCT  | tRFs | 18.09 | 5.45  | 21.22  | 6.71  | 22.12  | 6.67  | 13.88  | 4.39  | 0.5579 | 0.4199 | 0.0958 | 0.0443 |
| chr11.trna206-ThrTGT  | tRFs | 19.54 | 5.89  | 21.40  | 6.77  | 19.70  | 5.94  | 13.90  | 4.39  | 0.6781 | 0.9681 | 0.0307 | 0.0611 |
| chr15.trna876-MetCAT  | tRFs | 16.80 | 5.06  | 21.69  | 6.86  | 18.23  | 5.50  | 10.59  | 3.35  | 0.4482 | 0.8000 | 0.0385 | 0.0785 |
| chr13.trna988-SerGCT  | tRFs | 16.48 | 4.97  | 21.86  | 6.91  | 15.50  | 4.67  | 10.88  | 3.44  | 0.3465 | 0.8388 | 0.0199 | 0.1766 |
| chr11.trna1822-ThrAGT | tRFs | 7.93  | 2.39  | 15.92  | 5.03  | 20.15  | 6.07  | 20.86  | 6.60  | 0.0177 | 0.1465 | 0.6114 | 0.9537 |
| chr13.trna81-ThrAGT   | tRFs | 5.70  | 1.72  | 12.43  | 3.93  | 9.17   | 2.77  | 9.06   | 2.86  | 0.0355 | 0.2444 | 0.3504 | 0.9733 |
| chr13.trna1053-LysCTT | tRFs | 11.27 | 3.40  | 2.80   | 0.88  | 9.37   | 2.82  | 10.84  | 3.43  | 0.0410 | 0.6729 | 0.0656 | 0.7576 |
| chr11.trna1820-TrpCCA | tRFs | 8.88  | 2.68  | 9.84   | 3.11  | 9.74   | 2.94  | 4.38   | 1.39  | 0.7372 | 0.7069 | 0.0449 | 0.0103 |
| chr6.trna1021-CysGCA  | tRFs | 6.97  | 2.10  | 10.81  | 3.42  | 5.75   | 1.73  | 4.69   | 1.48  | 0.1192 | 0.5632 | 0.0175 | 0.6112 |
| chr6.trna1026-CysGCA  | tRFs | 4.22  | 1.27  | 6.05   | 1.91  | 8.05   | 2.43  | 7.94   | 2.51  | 0.2520 | 0.0238 | 0.4522 | 0.9641 |
| chr6.trna1022-CysGCA  | tRFs | 6.24  | 1.88  | 10.27  | 3.25  | 5.11   | 1.54  | 4.70   | 1.48  | 0.1273 | 0.5992 | 0.0378 | 0.8432 |
| chr6.trna1031-CysGCA  | tRFs | 4.93  | 1.49  | 9.93   | 3.14  | 6.13   | 1.85  | 4.41   | 1.39  | 0.0317 | 0.6377 | 0.0175 | 0.5004 |
| chr6.trna168-CysGCA   | tRFs | 6.91  | 2.08  | 9.38   | 2.97  | 5.18   | 1.56  | 3.59   | 1.14  | 0.1576 | 0.4077 | 0.0049 | 0.4770 |
| chr6.trna172-CysGCA   | tRFs | 5.95  | 1.79  | 7.91   | 2.50  | 6.58   | 1.98  | 3.62   | 1.14  | 0.3514 | 0.7828 | 0.0249 | 0.1653 |
| chr6.trna1006-CysGCA  | tRFs | 6.45  | 1.94  | 7.55   | 2.39  | 6.40   | 1.93  | 3.58   | 1.13  | 0.6134 | 0.9838 | 0.0437 | 0.1717 |
| chr6.trna163-CysGCA   | tRFs | 6.30  | 1.90  | 9.17   | 2.90  | 5.05   | 1.52  | 3.49   | 1.10  | 0.3244 | 0.5499 | 0.0460 | 0.3808 |

## SUPPLEMENTARY DATA

|                       |      |      |      |      |      |      |      |      |      |        |        |        |        |
|-----------------------|------|------|------|------|------|------|------|------|------|--------|--------|--------|--------|
| chr6.tRNA161-CysGCA   | tRFs | 5.66 | 1.71 | 7.44 | 2.35 | 6.54 | 1.97 | 2.91 | 0.92 | 0.3891 | 0.7237 | 0.0281 | 0.1496 |
| chr13.tRNA96-AlaAGC   | tRFs | 4.18 | 1.26 | 2.09 | 0.66 | 8.92 | 2.69 | 7.08 | 2.24 | 0.2798 | 0.2833 | 0.0288 | 0.6926 |
| chr6.tRNA1012-CysGCA  | tRFs | 7.37 | 2.22 | 6.60 | 2.09 | 3.64 | 1.10 | 2.29 | 0.72 | 0.7454 | 0.1030 | 0.0253 | 0.4236 |
| chr13.tRNA973-TyrGTA  | tRFs | 7.29 | 2.20 | 1.77 | 0.56 | 6.04 | 1.82 | 4.15 | 1.31 | 0.0822 | 0.7050 | 0.0036 | 0.2903 |
| chr19.tRNA106-PheGAA  | tRFs | 2.78 | 0.84 | 6.57 | 2.08 | 5.52 | 1.66 | 4.22 | 1.34 | 0.0564 | 0.0194 | 0.3179 | 0.4277 |
| chr13.tRNA970-TyrGTA  | tRFs | 6.05 | 1.83 | 1.46 | 0.46 | 3.90 | 1.17 | 4.12 | 1.30 | 0.1601 | 0.5120 | 0.0319 | 0.8931 |
| chr13.tRNA1004-SerGCT | tRFs | 3.14 | 0.95 | 0.97 | 0.31 | 2.05 | 0.62 | 2.65 | 0.84 | 0.0415 | 0.3412 | 0.0525 | 0.5505 |
| chr6.tRNA176-CysGCA   | tRFs | 1.19 | 0.36 | 3.79 | 1.20 | 2.26 | 0.68 | 1.45 | 0.46 | 0.0251 | 0.1825 | 0.0652 | 0.3782 |
| chr6.tRNA1033-CysGCA  | tRFs | 0.78 | 0.23 | 1.50 | 0.47 | 2.62 | 0.79 | 1.49 | 0.47 | 0.2052 | 0.0412 | 0.9899 | 0.3486 |
| chr13.tRNA983-ThrAGT  | tRFs | 1.78 | 0.54 | 0.08 | 0.03 | 0.52 | 0.16 | 1.12 | 0.35 | 0.0399 | 0.1359 | 0.0945 | 0.3784 |
| chr6.tRNA167-CysGCA   | tRFs | 0.59 | 0.18 | 0.84 | 0.27 | 1.52 | 0.46 | 0.06 | 0.02 | 0.5813 | 0.1986 | 0.0453 | 0.0434 |
| chr9.tRNA1100-AlaAGC  | tRFs | 0.00 | 0.00 | 0.74 | 0.23 | 1.14 | 0.34 | 0.45 | 0.14 | 0.0458 | 0.0742 | 0.4983 | 0.3131 |
